# Supplementary material for: Protein Environment: A Crucial Triggering Factor in Josephin Domain Aggregation: The Role of 2,2,2-Trifluoroethanol
Source: MDPI journal article supplement (doi:10.3390/ijms19082151), 2018-07-24
Supplement: s1 [file s1]

## Supplementary File

**Table S1.** Secondary structure of fresh and aggregated JD in the presence of different TFE concentrations. Assignment of secondary structures of ATR/FTIR spectra acquired after 0 and 24 h of incubation at 37 °C in the presence of 0, 1, 2 and 5% TFE. All the deconvolutions were performed using PickFit software.

|                            |                 | JD + 0% TFE |          | JD + 1% TFE |          | JD + 2% TFE |          | JD + 5% TFE |          |
|----------------------------|-----------------|-------------|----------|-------------|----------|-------------|----------|-------------|----------|
|                            |                 | t 0         | t 24     |
|                            |                 | Area (%)    | Area (%) |
| 1624 cm <sup>-1</sup>      | random coil     | 6.8         | -        | 5.7         | -        | 6.3         | -        | 7.8         | -        |
| 1628 cm <sup>-1</sup>      | β-sheet (inter) | -           | 32.1     | -           | 35.3     | -           | 36.6     | -           | 40.4     |
| 1635 cm <sup>-1</sup>      | β-sheet (intra) | 34.1        |          | 34.3        | -        | 35.7        | -        | 33.6        | -        |
| 1657 cm <sup>-1</sup>      | α-helix         | 44.0        | 41.1     | 45.3        | 38.7     | 45.7        | 35.4     | 45.9        | 41.4     |
| 1672/1681 cm <sup>-1</sup> | turns           | 15.1        | 20.2     | 14.7        | 19.7     | 12.3        | 19.8     | 12.7        | 18.5     |
| 1687 cm <sup>-1</sup>      | β-sheet (inter) | -           | 6.6      | -           | 6.3      | -           | 8.2      | -           | -        |
